# Supplementary material for: Extravascular modified lipoproteins: a role in the propagation of diabetic retinopathy in a mouse model of type 1 diabetes
Source: Springer Nature journal article supplement (doi:10.1007/s00125-016-4012-6), 2016-06-15
Supplement: MOESM1 [file 10267138]

**Electronic Supplementary Material (ESM) Figure 1.** High magnification (100x) representative images of inflammatory cell infiltration after intravitreal injection of HOG-LDL in diabetic C57BL/6J mice.

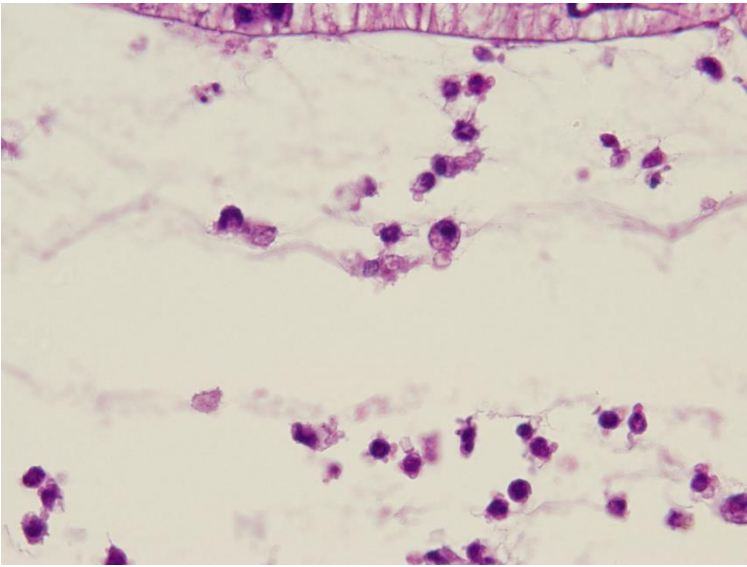

Day 3

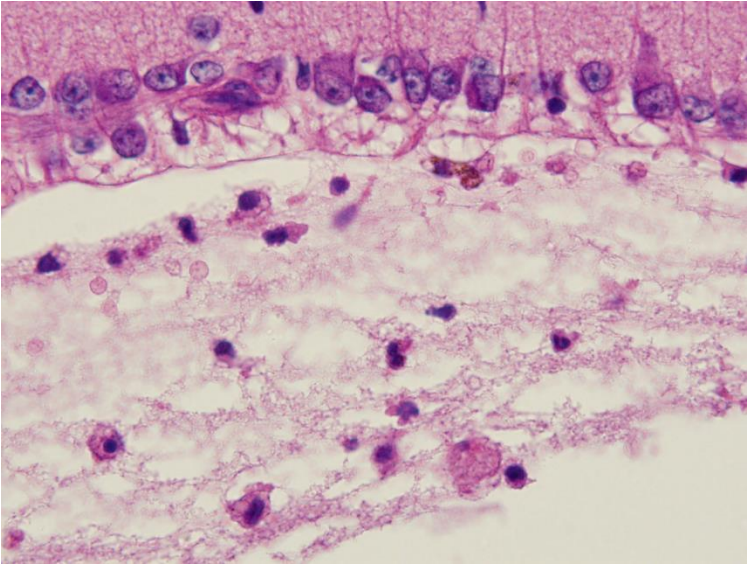

Day 7

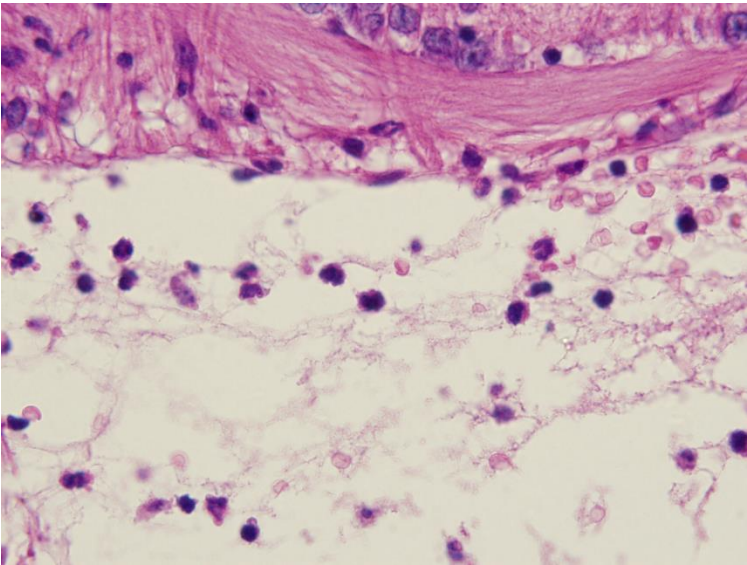

Day 14
